# Supplementary material
Source: PubMed Central journal article supplement (PMC341797)
Supplement: pnas_0303793101_2.pdf [file pnas_0303793101_2.pdf]

| 522 | 527 | 537 | 604 | 614 | 686 | 698 | 723 | 738 | 744 | 753 | 765 | 872 | 911 | 940 | 940 | 951 | 973 | 977 | 1011 |   |
|-----|-----|-----|-----|-----|-----|-----|-----|-----|-----|-----|-----|-----|-----|-----|-----|-----|-----|-----|------|---|
| N   | N   | N   | N   | N   | N   | N   | N   | N   | N   | N   | N   | N   | N   | N   | N   | N   | N   | N   | N    | N |
| A   | A   | G   | A   | G   | d4  | A   | A   | A   | T   | T   | d22 | A   | C   | T   | i3  | G   | G   | T   | C    |   |
| -   | -   | -   | -   | -   | -   | -   | -   | -   | -   | -   | -   | -   | -   | -   | -   | -   | -   | -   | -    | - |
| -   | -   | -   | -   | -   | -   | -   | -   | -   | -   | -   | -   | -   | -   | -   | -   | -   | -   | -   | -    | - |
| -   | -   | -   | -   | -   | -   | -   | -   | -   | -   | -   | -   | -   | -   | -   | -   | -   | -   | -   | -    | - |
| -   | -   | -   | -   | -   | -   | -   | -   | -   | -   | -   | -   | -   | -   | -   | -   | -   | -   | -   | -    | - |
| -   | -   | -   | -   | -   | -   | -   | -   | -   | -   | -   | -   | -   | -   | -   | -   | -   | -   | -   | -    | - |
| -   | -   | -   | -   | -   | -   | -   | -   | -   | -   | -   | -   | -   | -   | -   | -   | -   | -   | -   | -    | - |
| -   | -   | -   | -   | -   | -   | -   | -   | -   | -   | -   | -   | -   | -   | -   | -   | -   | -   | -   | -    | - |
| -   | -   | -   | -   | -   | -   | -   | -   | -   | -   | -   | -   | -   | -   | G   | -   | -   | -   | -   | A    | - |
| -   | -   | -   | -   | -   | -   | -   | -   | -   | -   | -   | -   | -   | -   | -   | -   | -   | -   | -   | -    | - |
| -   | -   | -   | -   | -   | -   | -   | -   | -   | -   | -   | -   | C   | -   | G   | -   | -   | -   | -   | A    | A |
| -   | -   | -   | -   | -   | -   | -   | -   | -   | -   | -   | -   | -   | -   | -   | -   | -   | -   | -   | -    | - |
| -   | -   | -   | -   | -   | i4  | -   | -   | -   | -   | -   | -   | -   | -   | -   | -   | -   | -   | -   | -    | - |
| -   | -   | -   | -   | -   | -   | -   | G   | G   | C   | C   | i22 | C   | G   | G   | -   | -   | -   | -   | A    | - |
| G   | G   | A   | T   | A   | -   | -   | -   | -   | -   | -   | -   | -   | -   | -   | -   | -   | -   | -   | -    | - |
| G   | G   | A   | T   | A   | -   | C   | -   | -   | -   | -   | -   | -   | -   | -   | -   | -   | -   | -   | -    | - |
| -   | -   | -   | -   | -   | -   | -   | -   | -   | -   | -   | -   | -   | -   | G   | -   | -   | -   | -   | -    | - |
| -   | -   | -   | -   | -   | -   | -   | -   | -   | -   | -   | -   | C   | G   | -   | d3  | T   | T   | -   | A    | A |

| 1012 | 1026 | 1038 | 1044 | 1203 | 1270 | 1272 | 1308 | 1314 | 1317 | 1347 | 1359 | 1365 | 1381 | 1393 | 1399 | 1410 | 1412 | 1413 | 1428 |
|------|------|------|------|------|------|------|------|------|------|------|------|------|------|------|------|------|------|------|------|
| N    | R    | S    | S    | S    | R    | S    | S    | S    | S    | S    | S    | S    | S    | R    | R    | S    | R    | S    | S    |
| G    | G    | A    | A    | T    | G    | T    | C    | T    | C    | T    | C    | C    | T    | A    | A    | A    | A    | C    | C    |
| -    | -    | -    | -    | -    | -    | -    | -    | -    | -    | -    | -    | -    | -    | -    | -    | -    | -    | -    | -    |
| -    | -    | -    | -    | -    | -    | -    | -    | -    | -    | -    | -    | -    | -    | -    | -    | -    | -    | -    | -    |
| -    | -    | -    | -    | -    | -    | -    | -    | -    | -    | -    | -    | -    | -    | -    | -    | -    | -    | -    | -    |
| -    | -    | -    | -    | -    | -    | -    | -    | -    | -    | -    | -    | -    | -    | -    | -    | -    | -    | -    | -    |
| -    | -    | -    | -    | -    | -    | -    | -    | -    | T    | -    | -    | -    | -    | -    | -    | -    | -    | -    | -    |
| -    | T    | -    | -    | A    | -    | -    | -    | -    | -    | -    | G    | -    | C    | -    | -    | -    | -    | -    | -    |
| -    | -    | -    | -    | -    | A    | A    | -    | C    | -    | C    | -    | A    | C    | -    | G    | G    | G    | A    | G    |
| C    | -    | C    | G    | -    | -    | -    | -    | -    | -    | -    | -    | -    | -    | -    | -    | -    | -    | -    | -    |
| -    | -    | -    | -    | -    | -    | -    | -    | -    | -    | -    | -    | -    | -    | -    | -    | -    | -    | -    | -    |
| -    | -    | -    | -    | -    | -    | -    | -    | -    | -    | -    | -    | -    | -    | -    | -    | -    | -    | -    | -    |
| C    | -    | C    | G    | A    | -    | -    | -    | -    | -    | -    | -    | -    | C    | -    | -    | G    | -    | -    | -    |
| -    | -    | -    | -    | -    | -    | -    | T    | -    | -    | -    | -    | -    | -    | -    | -    | -    | -    | -    | -    |
| -    | -    | -    | -    | -    | -    | -    | -    | -    | -    | -    | -    | -    | -    | -    | -    | -    | -    | -    | -    |
| -    | T    | -    | -    | A    | -    | -    | -    | -    | -    | -    | -    | -    | -    | G    | -    | -    | -    | -    | -    |
| C    | -    | C    | G    | A    | -    | -    | -    | -    | -    | C    | -    | -    | C    | -    | -    | G    | -    | -    | T    |

| 1467 | 1470 | 1473 | 1491 | 1495 | 1499 | 1511 | 1513 | 1515 | 1517 | 1518 | 1519 | 1525 | 1556 | 1582 | 1586 | 1595 | 1596 | 1598 | 1603 |
|------|------|------|------|------|------|------|------|------|------|------|------|------|------|------|------|------|------|------|------|
| S    | S    | S    | N    | N    | N    | N    | N    | N    | N    | N    | N    | N    | R    | R    | S    | S    | R    | S    | R    |
| T    | C    | G    | G    | G    | G    | T    | T    | C    | A    | G    | A    | A    | C    | A    | C    | C    | T    | G    | A    |
| -    | -    | -    | -    | -    | -    | -    | -    | -    | -    | -    | -    | -    | -    | -    | -    | -    | -    | -    | -    |
| -    | -    | -    | -    | -    | -    | -    | -    | -    | -    | -    | -    | -    | -    | -    | -    | -    | -    | -    | -    |
| -    | -    | -    | -    | -    | -    | -    | -    | -    | -    | -    | -    | -    | -    | -    | -    | -    | -    | -    | -    |
| -    | -    | -    | -    | -    | -    | -    | -    | -    | -    | -    | -    | -    | -    | -    | -    | -    | -    | -    | -    |
| -    | -    | -    | -    | -    | -    | -    | -    | -    | -    | -    | -    | -    | -    | -    | -    | -    | -    | -    | -    |
| -    | -    | -    | -    | -    | -    | -    | -    | -    | -    | -    | -    | -    | -    | -    | -    | -    | -    | -    | -    |
| -    | -    | -    | -    | -    | -    | -    | -    | -    | -    | -    | -    | -    | -    | -    | -    | -    | -    | -    | -    |
| C    | -    | T    | T    | -    | A    | C    | -    | A    | G    | A    | G    | T    | G    | G    | A    | -    | -    | T    | G    |
| -    | -    | -    | -    | -    | -    | -    | -    | -    | -    | -    | -    | -    | -    | -    | -    | -    | -    | -    | -    |
| -    | -    | -    | -    | -    | -    | -    | -    | -    | -    | -    | -    | -    | -    | -    | -    | -    | -    | -    | -    |
| -    | -    | -    | -    | -    | -    | -    | -    | -    | -    | -    | -    | -    | -    | -    | -    | -    | -    | -    | -    |
| -    | -    | -    | T    | -    | -    | -    | -    | -    | -    | -    | -    | -    | -    | -    | -    | -    | -    | -    | G    |
| -    | -    | -    | -    | -    | -    | -    | -    | -    | -    | -    | -    | -    | -    | -    | -    | -    | -    | -    | -    |
| -    | -    | -    | -    | -    | -    | -    | -    | -    | -    | -    | -    | -    | -    | -    | -    | -    | -    | -    | -    |
| -    | -    | -    | -    | -    | -    | -    | -    | -    | -    | -    | -    | -    | -    | -    | -    | -    | C    | -    | -    |
| -    | T    | -    | T    | C    | -    | -    | C    | -    | -    | -    | -    | -    | -    | -    | -    | T    | -    | -    | G    |

| 1634 | 1676 | 1682 | 1683 | 1691 | 1692 | 1706 | 1712 | 1721 | 1731 | 1750 | 1751 | 1769 | 1784 | 1811 | 1824 | 1832 | 1841 | 1859 | 1880 |
|------|------|------|------|------|------|------|------|------|------|------|------|------|------|------|------|------|------|------|------|
| S    | S    | S    | R    | S    | R    | S    | S    | S    | R    | R    | S    | S    | S    | S    | R    | S    | S    | S    | S    |
| C    | C    | C    | A    | G    | C    | G    | T    | C    | C    | G    | C    | C    | A    | C    | C    | C    | C    | C    | G    |
| -    | -    | -    | -    | -    | -    | -    | -    | -    | -    | -    | -    | -    | -    | -    | -    | -    | -    | -    | -    |
| -    | -    | -    | -    | -    | -    | -    | -    | -    | -    | -    | -    | -    | -    | -    | -    | -    | -    | -    | -    |
| -    | -    | -    | -    | -    | -    | -    | -    | -    | -    | -    | -    | -    | -    | -    | -    | -    | -    | -    | -    |
| -    | -    | -    | -    | -    | -    | -    | -    | -    | -    | -    | -    | -    | -    | -    | -    | -    | -    | -    | -    |
| -    | -    | -    | -    | -    | -    | -    | -    | -    | -    | -    | -    | -    | -    | -    | -    | -    | -    | -    | -    |
| -    | -    | -    | -    | -    | -    | -    | -    | -    | -    | -    | -    | -    | -    | -    | -    | -    | -    | -    | -    |
| -    | -    | -    | -    | -    | -    | -    | -    | -    | -    | -    | -    | -    | -    | -    | -    | -    | -    | -    | -    |
| -    | -    | -    | -    | -    | -    | -    | -    | -    | -    | -    | -    | -    | -    | -    | -    | -    | -    | -    | -    |
| T    | T    | T    | -    | A    | G    | A    | C    | T    | A    | C    | G    | T    | G    | T    | G    | T    | T    | T    | A    |
| -    | -    | -    | -    | -    | -    | -    | -    | -    | -    | -    | -    | -    | -    | -    | -    | -    | -    | -    | -    |
| -    | -    | -    | T    | -    | -    | -    | -    | -    | -    | -    | -    | -    | -    | -    | -    | -    | -    | -    | -    |
| -    | -    | -    | -    | -    | -    | -    | -    | -    | -    | -    | -    | -    | -    | -    | -    | -    | -    | -    | -    |
| -    | -    | -    | -    | -    | -    | -    | C    | -    | -    | C    | -    | -    | G    | -    | -    | -    | -    | -    | -    |
| -    | -    | -    | -    | -    | -    | -    | -    | -    | -    | -    | -    | -    | -    | -    | -    | -    | -    | -    | -    |
| -    | -    | -    | -    | -    | -    | -    | -    | -    | -    | -    | -    | -    | -    | -    | -    | -    | -    | -    | -    |
| -    | -    | -    | -    | -    | -    | -    | -    | -    | -    | -    | -    | -    | -    | -    | -    | -    | -    | -    | -    |
| -    | -    | -    | -    | -    | -    | -    | C    | -    | -    | C    | -    | -    | G    | -    | -    | -    | -    | -    | A    |

| 1907 | 1910 | 1913 | 1924 | 1942 | 1994 | 2000 | 2009 | 2028 | 2032 | 2048 | 2135 | 2136 | 2168 | 2243 | 2247 | 2258 | 2267 | 2270 | 2276 |
|------|------|------|------|------|------|------|------|------|------|------|------|------|------|------|------|------|------|------|------|
| S    | S    | S    | R    | R    | S    | S    | S    | R    | R    | S    | S    | R    | S    | S    | R    | S    | S    | S    | S    |
| G    | T    | T    | G    | C    | C    | A    | C    | A    | C    | C    | G    | T    | G    | T    | C    | G    | T    | G    | G    |
| -    | -    | -    | -    | -    | -    | -    | -    | -    | -    | -    | -    | -    | -    | -    | -    | -    | -    | -    | -    |
| -    | -    | -    | -    | -    | -    | -    | -    | -    | -    | -    | -    | -    | -    | -    | -    | -    | -    | -    | -    |
| -    | -    | -    | -    | -    | -    | -    | -    | -    | -    | -    | -    | -    | -    | -    | -    | -    | -    | -    | -    |
| -    | -    | -    | -    | -    | -    | -    | -    | -    | -    | -    | -    | -    | -    | -    | -    | -    | -    | -    | -    |
| -    | -    | -    | -    | -    | -    | -    | -    | T    | -    | -    | -    | -    | -    | -    | -    | -    | -    | -    | -    |
| -    | -    | -    | C    | -    | -    | -    | -    | -    | -    | -    | -    | -    | -    | C    | G    | A    | C    | -    | -    |
| C    | A    | -    | -    | -    | T    | G    | T    | -    | -    | -    | -    | -    | -    | -    | -    | -    | C    | -    | -    |
| -    | -    | -    | -    | -    | -    | -    | -    | -    | -    | -    | -    | -    | -    | -    | -    | -    | C    | -    | -    |
| -    | -    | -    | -    | -    | -    | -    | -    | -    | -    | -    | T    | -    | -    | -    | -    | -    | C    | T    | A    |
| -    | -    | -    | -    | -    | -    | -    | -    | -    | -    | -    | -    | -    | -    | -    | -    | -    | C    | -    | -    |
| -    | -    | -    | -    | A    | -    | -    | -    | -    | -    | -    | T    | C    | -    | -    | -    | -    | C    | T    | A    |
| -    | -    | -    | -    | -    | -    | -    | -    | -    | -    | -    | -    | -    | -    | -    | -    | -    | C    | -    | -    |
| -    | -    | C    | -    | -    | -    | -    | -    | -    | -    | -    | -    | -    | -    | -    | -    | -    | C    | -    | -    |
| -    | -    | -    | -    | -    | -    | -    | -    | -    | -    | -    | -    | -    | A    | -    | -    | -    | C    | -    | -    |
| -    | -    | -    | C    | -    | -    | -    | -    | -    | T    | A    | -    | -    | -    | -    | -    | -    | C    | -    | -    |



| 2590 | 2597 | 2614 | 2636 | 2648 | 2654 | 2660 | 2663 | 2664 | 2670 | 2693 | 2699 | 2709 | 2720 | 2733 | 2751 | 2754 | 2760 | 2770 | 2773 |
|------|------|------|------|------|------|------|------|------|------|------|------|------|------|------|------|------|------|------|------|
| R    | R    | R    | R    | S    | S    | S    | S    | S    | R    | R    | S    | R    | N    | N    | N    | N    | N    | N    | N    |
| G    | G    | T    | C    | G    | T    | C    | T    | T    | G    | G    | T    | A    | C    | C    | d3   | G    | G    | i2   | C    |
| -    | -    | -    | -    | -    | -    | -    | -    | -    | -    | -    | -    | -    | -    | -    | -    | -    | -    | -    | -    |
| -    | -    | -    | -    | -    | -    | -    | -    | -    | -    | -    | -    | -    | -    | -    | -    | -    | -    | -    | -    |
| -    | -    | -    | -    | -    | -    | -    | -    | -    | -    | -    | -    | -    | -    | -    | -    | -    | -    | -    | -    |
| -    | -    | -    | -    | -    | -    | -    | -    | -    | -    | -    | -    | -    | -    | -    | -    | -    | -    | -    | -    |
| -    | -    | -    | -    | -    | -    | -    | -    | -    | -    | -    | -    | -    | -    | -    | -    | -    | -    | -    | -    |
| -    | -    | -    | -    | -    | -    | -    | -    | -    | -    | -    | -    | -    | -    | -    | -    | -    | -    | -    | -    |
| -    | -    | -    | -    | -    | -    | -    | -    | -    | -    | -    | -    | -    | -    | -    | -    | -    | -    | -    | -    |
| A    | -    | -    | A    | A    | -    | A    | -    | C    | A    | T    | C    | C    | T    | T    | i3   | A    | A    | -    | T    |
| -    | -    | -    | -    | -    | -    | -    | -    | -    | -    | -    | -    | -    | -    | -    | -    | -    | -    | -    | -    |
| -    | -    | -    | -    | -    | -    | -    | -    | -    | -    | -    | -    | -    | -    | -    | -    | -    | -    | -    | -    |
| -    | -    | -    | -    | -    | -    | -    | -    | -    | -    | -    | C    | -    | -    | T    | -    | -    | A    | d2   | -    |
| -    | -    | -    | -    | -    | -    | -    | -    | -    | -    | -    | C    | -    | -    | T    | -    | -    | A    | d2   | -    |
| -    | -    | C    | -    | -    | -    | -    | -    | -    | -    | -    | -    | -    | -    | -    | -    | A    | -    | -    | -    |
| -    | -    | -    | -    | -    | -    | -    | -    | -    | -    | -    | -    | -    | -    | -    | -    | -    | -    | -    | -    |
| -    | -    | -    | -    | -    | -    | -    | -    | -    | -    | -    | -    | -    | -    | -    | -    | -    | -    | -    | -    |
| -    | T    | -    | -    | -    | C    | -    | C    | -    | -    | -    | C    | -    | -    | -    | -    | -    | A    | -    | -    |



| 2774 | 2786 | 2804 | 2811 | 2824 | 2832 | 2836 | 2843 | 2854 | 2861 | 2865 | 2879 | 2886 | 2898 | 2906 | 2912 | 2932 | 2937 | 2971 |
|------|------|------|------|------|------|------|------|------|------|------|------|------|------|------|------|------|------|------|
| N    | N    | N    | N    | N    | N    | N    | N    | N    | N    | N    | N    | N    | N    | N    | N    | N    | N    | N    |
| d4   | G    | i1   | C    | A    | C    | C    | G    | C    | C    | d3   | C    | d12  | i20  | d2   | i2   | T    | T    | d3   |
| -    | -    | -    | -    | -    | -    | -    | -    | -    | -    | -    | -    | -    | -    | -    | -    | -    | -    | -    |
| -    | -    | -    | -    | -    | -    | -    | -    | -    | -    | -    | -    | -    | -    | -    | -    | -    | -    | -    |
| -    | -    | -    | -    | -    | -    | -    | -    | -    | -    | -    | -    | -    | -    | -    | -    | -    | -    | -    |
| -    | -    | -    | -    | -    | -    | -    | -    | -    | -    | -    | -    | -    | -    | -    | -    | -    | -    | -    |
| -    | -    | -    | -    | -    | -    | -    | -    | -    | -    | -    | -    | -    | -    | -    | -    | -    | -    | -    |
| -    | -    | -    | -    | -    | -    | -    | -    | -    | -    | -    | -    | -    | -    | -    | -    | -    | -    | -    |
| -    | -    | -    | -    | -    | -    | -    | -    | -    | -    | -    | -    | -    | -    | -    | -    | -    | -    | -    |
| i4   | -    | d1   | -    | G    | -    | T    | C    | G    | T    | i3   | T    | -    | -    | i2   | d2   | -    | A    | i3   |
| -    | -    | -    | -    | -    | -    | -    | -    | -    | -    | -    | -    | i12  | i20  | -    | -    | -    | -    | -    |
| -    | -    | -    | -    | -    | -    | -    | -    | -    | -    | -    | -    | -    | -    | -    | -    | -    | -    | -    |
| -    | A    | d1   | T    | -    | A    | -    | -    | -    | -    | -    | -    | -    | -    | -    | -    | -    | -    | -    |
| -    | -    | -    | -    | -    | -    | -    | -    | -    | -    | -    | -    | -    | -    | -    | -    | -    | -    | -    |
| -    | A    | d1   | T    | -    | A    | -    | -    | -    | -    | -    | -    | -    | -    | -    | -    | -    | -    | -    |
| -    | -    | -    | -    | -    | -    | -    | -    | -    | -    | -    | -    | -    | -    | -    | -    | -    | -    | -    |
| -    | -    | -    | -    | -    | -    | -    | -    | -    | -    | -    | -    | -    | -    | -    | -    | -    | -    | -    |
| -    | -    | -    | -    | -    | -    | -    | -    | -    | -    | -    | -    | -    | -    | -    | -    | -    | -    | -    |
| -    | -    | -    | -    | -    | -    | -    | -    | -    | -    | -    | -    | -    | -    | -    | -    | -    | -    | -    |
| -    | -    | -    | -    | -    | -    | -    | -    | -    | -    | -    | -    | -    | -    | -    | -    | C    | -    | -    |

---

Position is relative to a consensus sequence made from aligning the *D. simulans*, *D. melanogaster*, and *D. yakuba* sequences. The *Doc* insertion is located at position 0. Sequences are available in GenBank. Type of site is noncoding (N), silent coding (S), or replacement coding (R). Lines have a "-" at a particular base if their sequence matches that of the first sequence (CS1). Indels are labeled as "i" for insertion or "d" for deletion, with the size of the indel in base pairs following.
