# Supplementary material
Source: PubMed Central journal article supplement (PMC341797)
Supplement: pnas_0303793101_5.pdf [file pnas_0303793101_5.pdf]

a)

CG8447 stop

codon

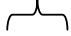

taatgaaattcacaaatgcatcaaaagcttgacgagaaagccggttgtgtt

Oct-1

Barbie box

Barbie box

Accord insertion in *D.melanogaster*

aattatttatagattatagcgtgcaataacttttcatatcgtatatgtattgc

Ahr-

CHOP

Oct-1

gttaacgcttttaaaaatctaactaaaccatagcacacaaaagtaaataag

Oct-1

4.8kb Doc insertion in *D.simulans*

CG8447 transcription

stop

gttgtaaactaagaatcattataataaatgtaatcatgacttgtaattat

Oct-1

cttagagtcctctggatttgctgtggtttgtttgctattttaaagctt

Oct-1

ttcaccacacaggtgaatttataagtatgcacttgaaattgctatctcaga

Oct-1

Cyp6g1 transcription

start

acttttgagactttcgagtataaaaacgcaaacatttcaaatcgcccca

Oct-1

b)

gtttcgataagtgactcaagtggaaaaaaaaaagtgctacacttgacacagtg

**CG9137 5' UTR**

Barbie box

tttgactttgcgctgatttaatctctcgcccgcccttggctgtggacttgag

**Cyp12c1 5' flank**
